# Supplementary material for: Perception of the Geological-Mining Heritage to Promote Geotourism in Guayaquil, Ecuador
Source: MDPI journal article supplement (doi:10.3390/geosciences12090322), 2022-08-29
Supplement: s1 [file s1]

## SUPPLEMENTARY MATERIALS

### Article

### Perception of the Geological-Mining Heritage to Promote Geotourism in Guayaquil, Ecuador .

#### Supplementary Materials:

Table S1 shows the questions asked with their respective multiple choice answers that each respondent could choose. In addition, questions 15, 16 and 17 have the option of answering at the discretion of each one.

**Table S1.** Geological and mining heritage perception survey questions.

The Escuela Superior Politécnica del Litoral (ESPOL) of Ecuador is studying the "Perception of the geological-mining heritage of the inhabitants of Guayaquil". Your authorization is requested to participate in this research project, whose objective is to evaluate the perception of the city's geoheritage to promote knowledge and dissemination of the geological-mining heritage. Your participation is entirely voluntary, and if you do not wish to participate, there will be no adverse consequences. You can withdraw from the study at any time. The response is completely anonymous. If you have any questions, please contact Boris Apolo/Paúl Carrión, whose email addresses are: [bhapolo@espol.edu.ec](mailto:bhapolo@espol.edu.ec) and [pcarrion@espol.edu.ec](mailto:pcarrion@espol.edu.ec).

| N.- | Questions                                                     | Answers            |
|-----|---------------------------------------------------------------|--------------------|
| 1   | How many years have you been living in the city of Guayaquil? | Under 1 year       |
|     |                                                               | 1 to 5 years       |
|     |                                                               | 6 to 10 years      |
|     |                                                               | 11 to 15 years     |
|     |                                                               | 16 to 20 years     |
|     |                                                               | Over 20 years      |
| 2   | What part of the city do you live in?                         | North              |
|     |                                                               | Center             |
|     |                                                               | South              |
| 3   | Sex                                                           | Female             |
|     |                                                               | Male               |
| 4   | Years old                                                     | 16 to 25 years old |
|     |                                                               | 26 to 35 years old |
|     |                                                               | 36 to 45 years old |
|     |                                                               | 46 to 64 years old |
|     |                                                               | Over 65 years old  |
| 5   | Education (C= complete, I= incomplete)                        | School C           |
|     |                                                               | School I           |
|     |                                                               | High School C      |
|     |                                                               | High School I      |
|     |                                                               | University C       |
|     |                                                               | University I       |
| —   |                                                               | Postgrade C        |

|    |                                                                                                                                | Postgrade I                                                                                                 |
|----|--------------------------------------------------------------------------------------------------------------------------------|-------------------------------------------------------------------------------------------------------------|
| 6  | Do you own the following electronic devices?                                                                                   | Desktop computer (PC)                                                                                       |
|    |                                                                                                                                | Laptop                                                                                                      |
|    |                                                                                                                                | Tablet                                                                                                      |
|    |                                                                                                                                | Mobile phone                                                                                                |
|    |                                                                                                                                | Mart TV                                                                                                     |
| 7  | What type of media do you mainly use for information?                                                                          | None                                                                                                        |
|    |                                                                                                                                | TV                                                                                                          |
|    |                                                                                                                                | Websites                                                                                                    |
|    |                                                                                                                                | Social networks                                                                                             |
|    |                                                                                                                                | Newspaper                                                                                                   |
| 8  | What topics do you like to be informed about?                                                                                  | Magazines                                                                                                   |
|    |                                                                                                                                | Radio                                                                                                       |
|    |                                                                                                                                | Education                                                                                                   |
|    |                                                                                                                                | Culture                                                                                                     |
|    |                                                                                                                                | Local tourism                                                                                               |
| 9  | Do you manage social networks?                                                                                                 | Shows                                                                                                       |
|    |                                                                                                                                | Tourism abroad                                                                                              |
|    |                                                                                                                                | Science                                                                                                     |
|    |                                                                                                                                | Technology                                                                                                  |
|    |                                                                                                                                | Policy                                                                                                      |
| 10 | How often do you use social networks?<br>Understand as 1 (Always), 2 (Almost always), 3 (Sometimes), 4 (Seldom) and 5 (Never). | Sports                                                                                                      |
|    |                                                                                                                                | Yes                                                                                                         |
|    |                                                                                                                                | No                                                                                                          |
|    |                                                                                                                                | 1                                                                                                           |
|    |                                                                                                                                | 2                                                                                                           |
| 11 | Usually when you see news (social media, newspaper), what do you do?                                                           | 3                                                                                                           |
|    |                                                                                                                                | 4                                                                                                           |
|    |                                                                                                                                | 5                                                                                                           |
|    |                                                                                                                                | Read only the headline of the news item, photo or video. photo or video                                     |
|    |                                                                                                                                | Read the headline and all content                                                                           |
| 12 | Have you travelled abroad?                                                                                                     | Read all the content and also verify information in other media                                             |
|    |                                                                                                                                | Yes                                                                                                         |
|    |                                                                                                                                | No                                                                                                          |
|    |                                                                                                                                | Yes                                                                                                         |
|    |                                                                                                                                | No                                                                                                          |
| 13 | Have you travelled within the country?                                                                                         | Yes                                                                                                         |
|    |                                                                                                                                | No                                                                                                          |
|    |                                                                                                                                | Yes                                                                                                         |
|    |                                                                                                                                | No                                                                                                          |
|    |                                                                                                                                | Yes                                                                                                         |
| 14 | Have you travelled in the canton of Guayaquil?                                                                                 | No                                                                                                          |
|    |                                                                                                                                | If you have travelled OUTSIDE THE COUNTRY, answer: Where and Reason. If you have not travelled, answer "No" |
|    |                                                                                                                                | Formulate your answer                                                                                       |
|    |                                                                                                                                | If you have travelled WITHIN THE COUNTRY, answer: Where and Reason. If you have not travelled, answer "No"  |
|    |                                                                                                                                | Formulate your answer                                                                                       |
| 15 | If you have travelled IN GUAYAQUIL, answer: Where and Reason. If you have not travelled, answer "No"                           | Formulate your answer                                                                                       |
|    |                                                                                                                                | Formulate your answer                                                                                       |

|    |                                                                                                                      |                                                                                                                                                                                                                                                                                            |
|----|----------------------------------------------------------------------------------------------------------------------|--------------------------------------------------------------------------------------------------------------------------------------------------------------------------------------------------------------------------------------------------------------------------------------------|
| 18 | Do you consider tourism to be beneficial for the city's inhabitants?                                                 | Yes<br>No                                                                                                                                                                                                                                                                                  |
| 19 | If your answer to the previous question was Yes, please answer: How is tourism beneficial to the city's inhabitants? | Generates jobs<br>Generates sales for goods and services<br>Resource preservation                                                                                                                                                                                                          |
| 20 | In COVID-19 times, which type of tourism do you consider to be safer?                                                | Closed places without natural spaces<br>Sites with natural areas                                                                                                                                                                                                                           |
| 21 | Do you know what heritage is?                                                                                        | Yes<br>No                                                                                                                                                                                                                                                                                  |
| 22 | Do you know what geodiversity is?                                                                                    | Yes<br>No                                                                                                                                                                                                                                                                                  |
| 23 | Do you know what geology is?                                                                                         | Yes<br>No                                                                                                                                                                                                                                                                                  |
| 24 | Do you know the following earth science terms?                                                                       | Stratigraphy<br>Tectonics<br>Hydrogeology<br>Outcrop<br>Morphology<br>Sedimentary structures<br>Estuary<br>Fossils<br>Mining deposits<br>Formations<br>All the above<br>None                                                                                                               |
| 25 | Would you like to learn about earth sciences through visits to different places in your city?                        | Yes<br>No                                                                                                                                                                                                                                                                                  |
| 26 | Do you consider that the city of Guayaquil has tourist sites of international relevance?                             | Yes<br>No                                                                                                                                                                                                                                                                                  |
| 27 | Have you heard about the following sites?                                                                            | Santa Ana Hill<br>Cerro del Carmen<br>San Pedro hill<br>Puná island<br>Santay island<br>Zeolite quarries<br>Pascuales quarry<br>San Eduardo quarry<br>Azul Hill<br>Salty estuary (Malecón del Salado)<br>Guayas river (Malecón 2000)<br>Lime kilns (Cerro Blanco)<br>All the above<br>None |
| 28 | What reason has motivated and/or would motivate you to visit any of the following sites?                             | Heritage<br>Protected area<br>Amusement<br>Landscape/Geology/Geodiversity<br>Biodiversity<br>Education                                                                                                                                                                                     |
| 29 | Do you know what geotourism is?                                                                                      | Yes                                                                                                                                                                                                                                                                                        |

|    |                                                                          |                                                                                                                                             |
|----|--------------------------------------------------------------------------|---------------------------------------------------------------------------------------------------------------------------------------------|
|    |                                                                          | No                                                                                                                                          |
| 30 | Would you be interested in learning about geotourism in your city?       | Yes<br>No                                                                                                                                   |
| 31 | How would you help to promote landscape and nature tourism in your city? | Preserving Economically<br>Sharing information with family members<br>Sharing information at work<br>Sharing information on social networks |
| 32 | Are you happy in your city (General: territory, resources, services)?    | Yes<br>No                                                                                                                                   |
| 33 | What do you consider to be the most outstanding aspects of your city?    | Education<br>Access routes<br>Promotion of tourist and recreational sites<br>Security<br>Infrastructure                                     |
| 34 | What aspects do you think need to be improved in your city?              | Education<br>Access routes<br>Promotion of tourist and recreational sites<br>Security<br>Infrastructure                                     |
